# Supplementary material for: Feasibility and Acceptability of Technology Assisted Problem Management Plus (TA-PM+) in a Community Settings of Pakistan: A Pre-Post Mixed-Methods Study
Source: Research Square preprint supplement (doi:10.21203/rs.3.rs-6428726/v1), 2026-01-30
Supplement: Supplementary file [file 4236466c8b93885ee2132d2b.pdf]

## Covariate Analysis of GAD-7 and PHQ-9 scores.

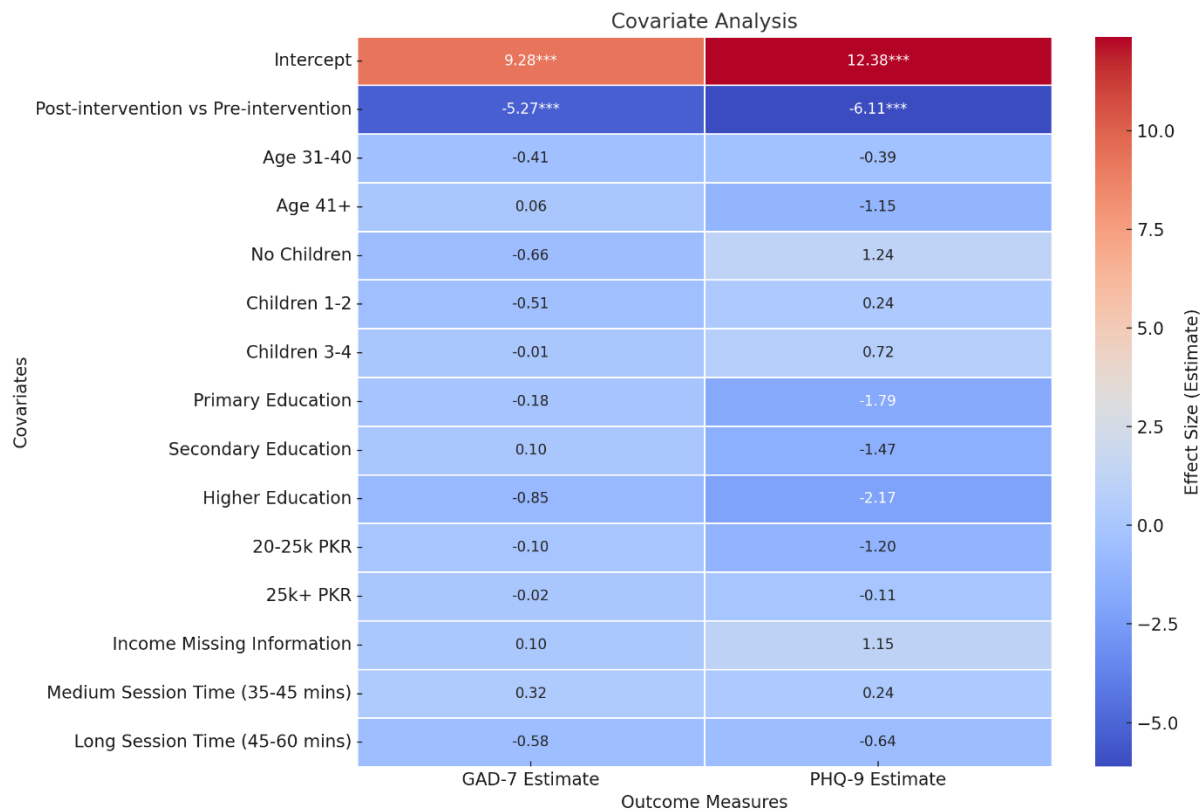

GAD-7: Generalized Anxiety Disorder-7,  
 PHQ-9: Patient Health Questionnaire-9,  
 \*\*\*:  $p < 0.001$  and denote significance,  
 PKR: Pakistani Rupee.

## Sensitivity Analysis (without Participants of LHW 8 and 9)

| Measure | N  | Baseline Mean (SD) | Follow-up Mean (SD) | Mean Difference | Difference SD | t(df)     | p -Value | Signed Rank Statistic (S) | p (Wilcoxon) |
|---------|----|--------------------|---------------------|-----------------|---------------|-----------|----------|---------------------------|--------------|
| PHQ-9   | 56 | 12.73 (5.42)       | 5.61 (4.72)         | 7.12            | 7.73          | 6.64 (55) | < .001   | 177.5                     | < .001       |
| GAD-7   | 56 | 8.82 (4.20)        | 3.34 (3.41)         | 5.48            | 5.99          | 6.64 (55) | < .001   | 145                       | < .001       |
